# Supplementary material
Source: Springer Nature journal article supplement (https://www.springermedizin.de/resource/supplementary/12916_2013_957_MOESM5_ESM.pdf/9598906)
Supplement: MOESM5 [file 9598906]

**a**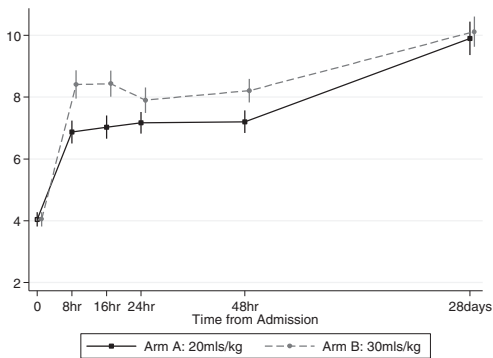

| Time:            | 0hrs | 8hrs    | 16hrs   | 24hrs | 48hrs | 28days |
|------------------|------|---------|---------|-------|-------|--------|
| N Arm A:20mls/kg | 82   | 73      | 76      | 77    | 76    | 70     |
| N Arm B:30mls/kg | 78   | 75      | 76      | 74    | 74    | 71     |
| P                |      | <0.0001 | <0.0001 | 0.008 | 0.002 | 0.59   |

Global test of difference between the arms in change in haemoglobin from admission through to 28 days:  $p < 0.0001$

**b**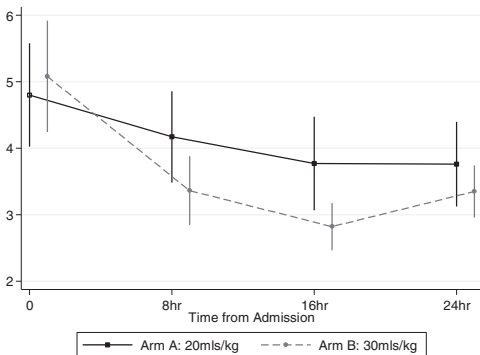

| Time:             | 0hrs | 8hrs | 16hrs | 24hrs |
|-------------------|------|------|-------|-------|
| N Arm A:20 mls/kg | 82   | 73   | 77    | 75    |
| N Arm B:30mls/kg  | 76   | 73   | 75    | 73    |
| P=                |      | 0.17 | 0.04  | 0.22  |

Global test of difference between the arms in change in lactate from admission through to 24 hours:  $p = 0.02$
